# Supplementary material
Source: publisher figshare collection journal article supplement (https://acs.figshare.com/ndownloader/files/22317924)
Supplement: Supplementary file 1 [file 22317924]

## **Rolling Circle Amplification-Based Polyvalent Molecular Beacon Probe Assisted Signal-Amplification Strategies for Sensitive-Detection of B16 Cells**

Zhiqing Zhang\*, Shanshan Wang, Jie Ma, Ting Zhou\*, Fang Wang, Xiufeng Wang,  
and Guodong Zhang

Department of Chemistry, College of Science, China University of Petroleum (East  
China), Qingdao, 266580, P. R. China

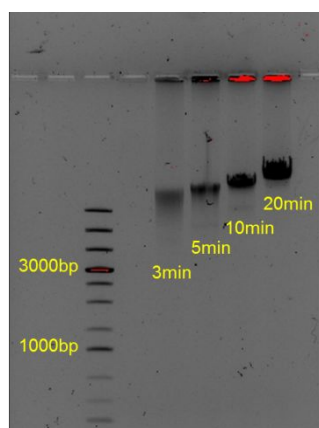

**Figure S1.** The agarose gel electrophoresis of RCA products under different reaction times.

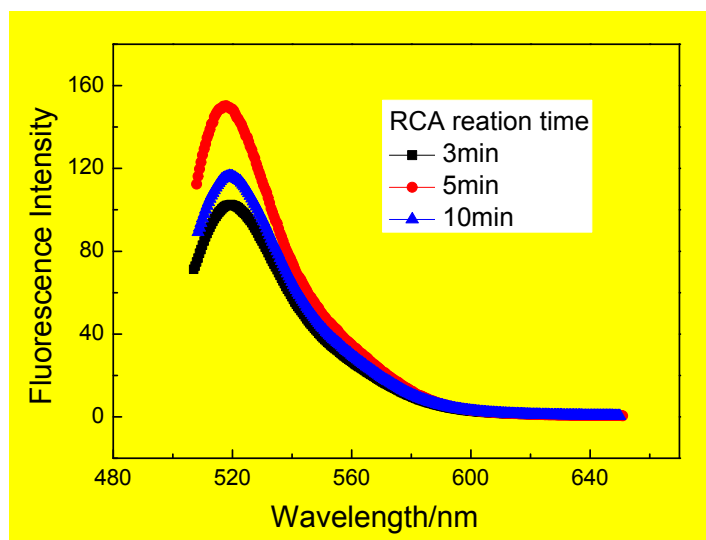

**Figure S2.** Effect of RCA reaction time on fluorescence intensity of MB ( $c_{\text{RCA}}=10\text{nM}$ ,  $c_{\text{MB}}=30\text{nM}$ )

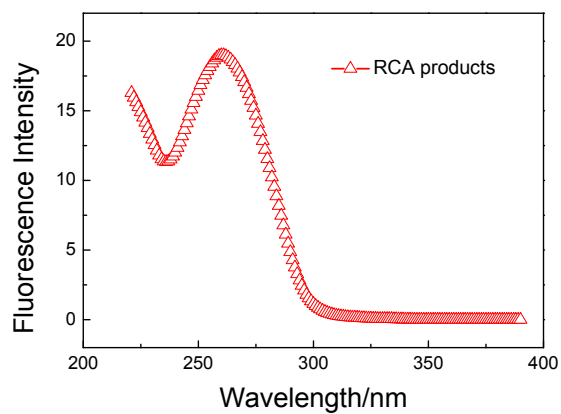

**Figure S3.** The ultraviolet absorption spectrum of the RCA products.

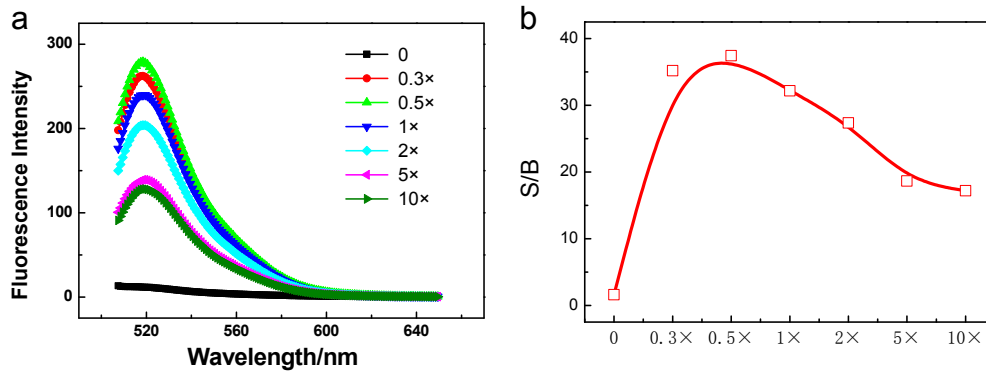

**Figure S4.** Effect of buffer dilution on fluorescence intensity of assembly.

(a) Fluorescence curve; (b) Signal-to-background ratio curve. Fixed molecular beacon concentration of 30 nM, RCA concentration of 10 nM, change the concentration of the buffer. The composition of the 10× RCA buffer solution: 500 mM Tris-HCl, 100 mM MgCl<sub>2</sub>, 100 mM (NH<sub>4</sub>)<sub>2</sub>SO<sub>4</sub>, pH=7.5.

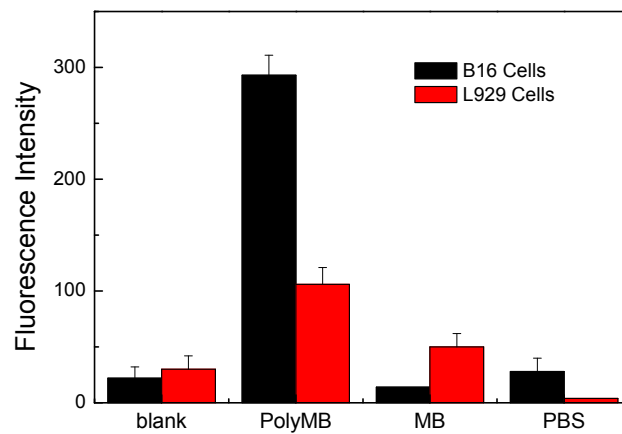

**Figure S5.** Targeted specific detection of cells by enzyme standard instrument
